# Supplementary figures and images for: MLVA-16 Genotyping of Brucella abortus and Brucella melitensis Isolates from Different Animal Species in Egypt: Geographical Relatedness and the Mediterranean Lineage
Source: MDPI journal article supplement (doi:10.3390/pathogens9060498), 2020-06-22

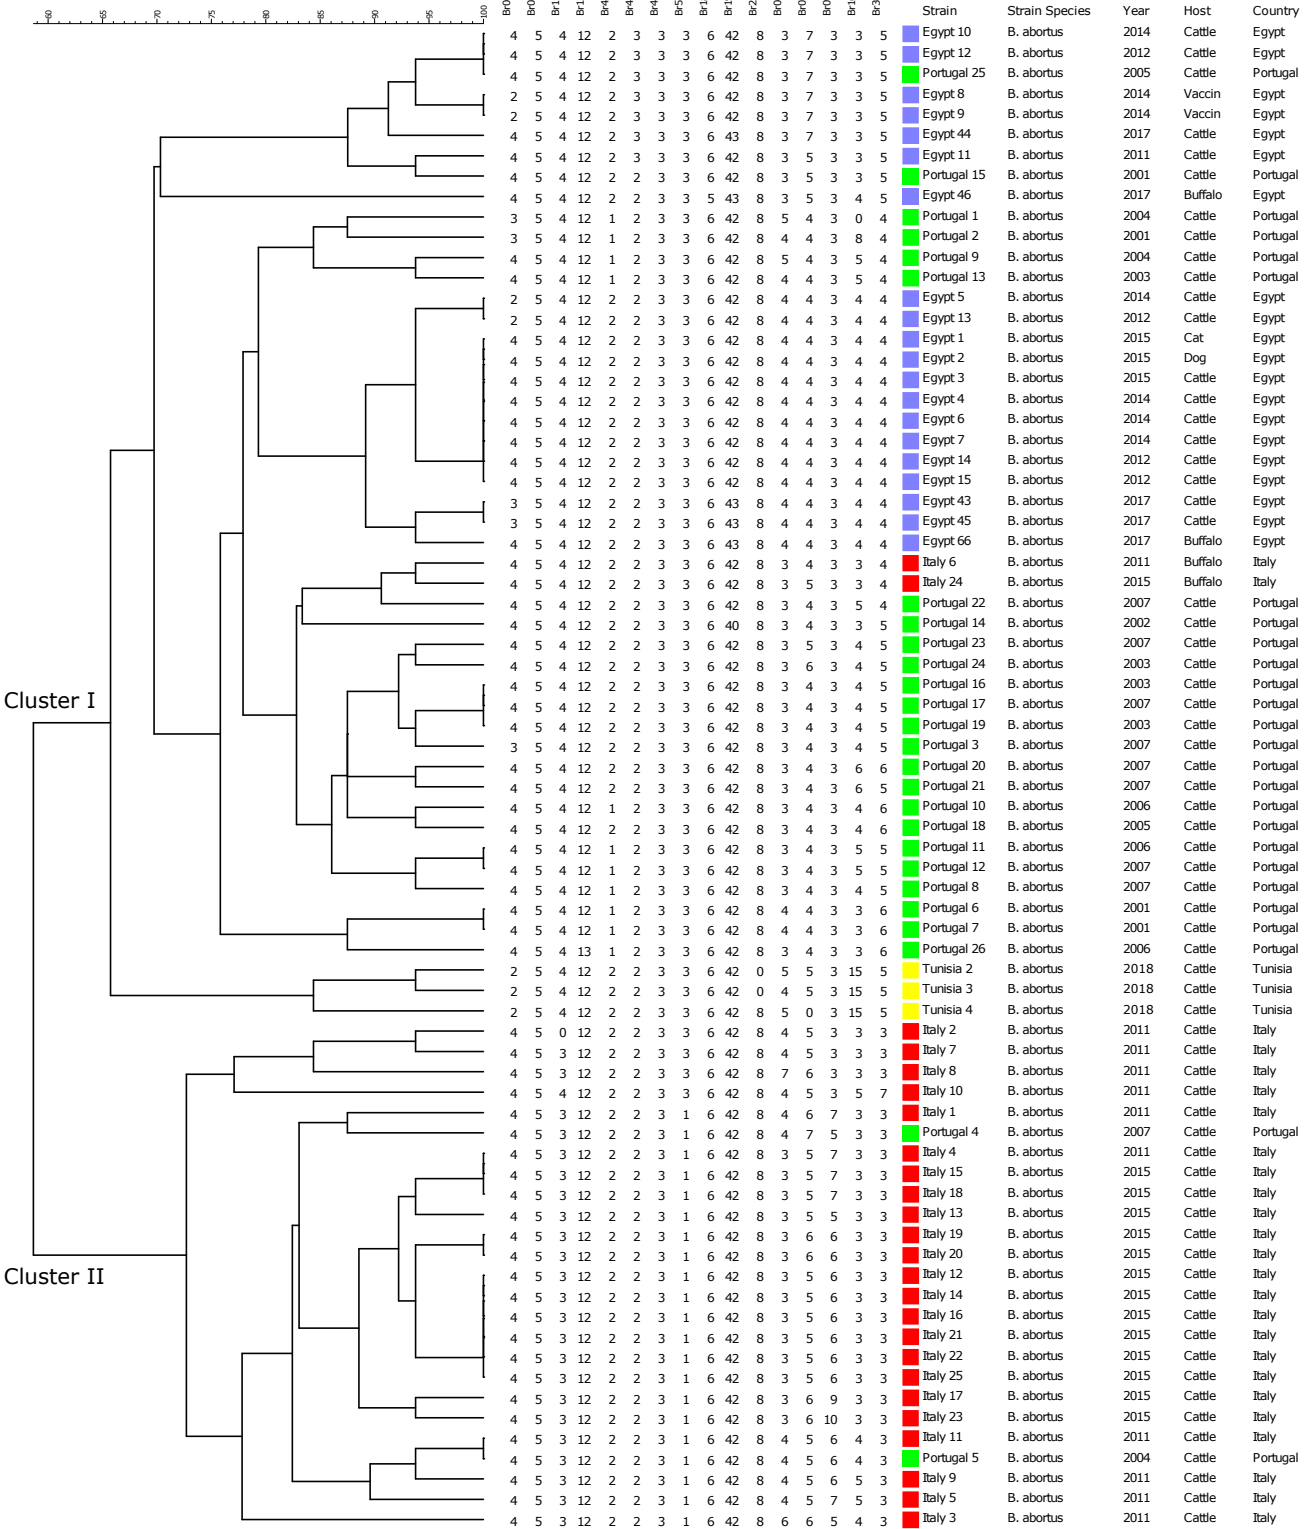

Supplement: s1 [file s1]

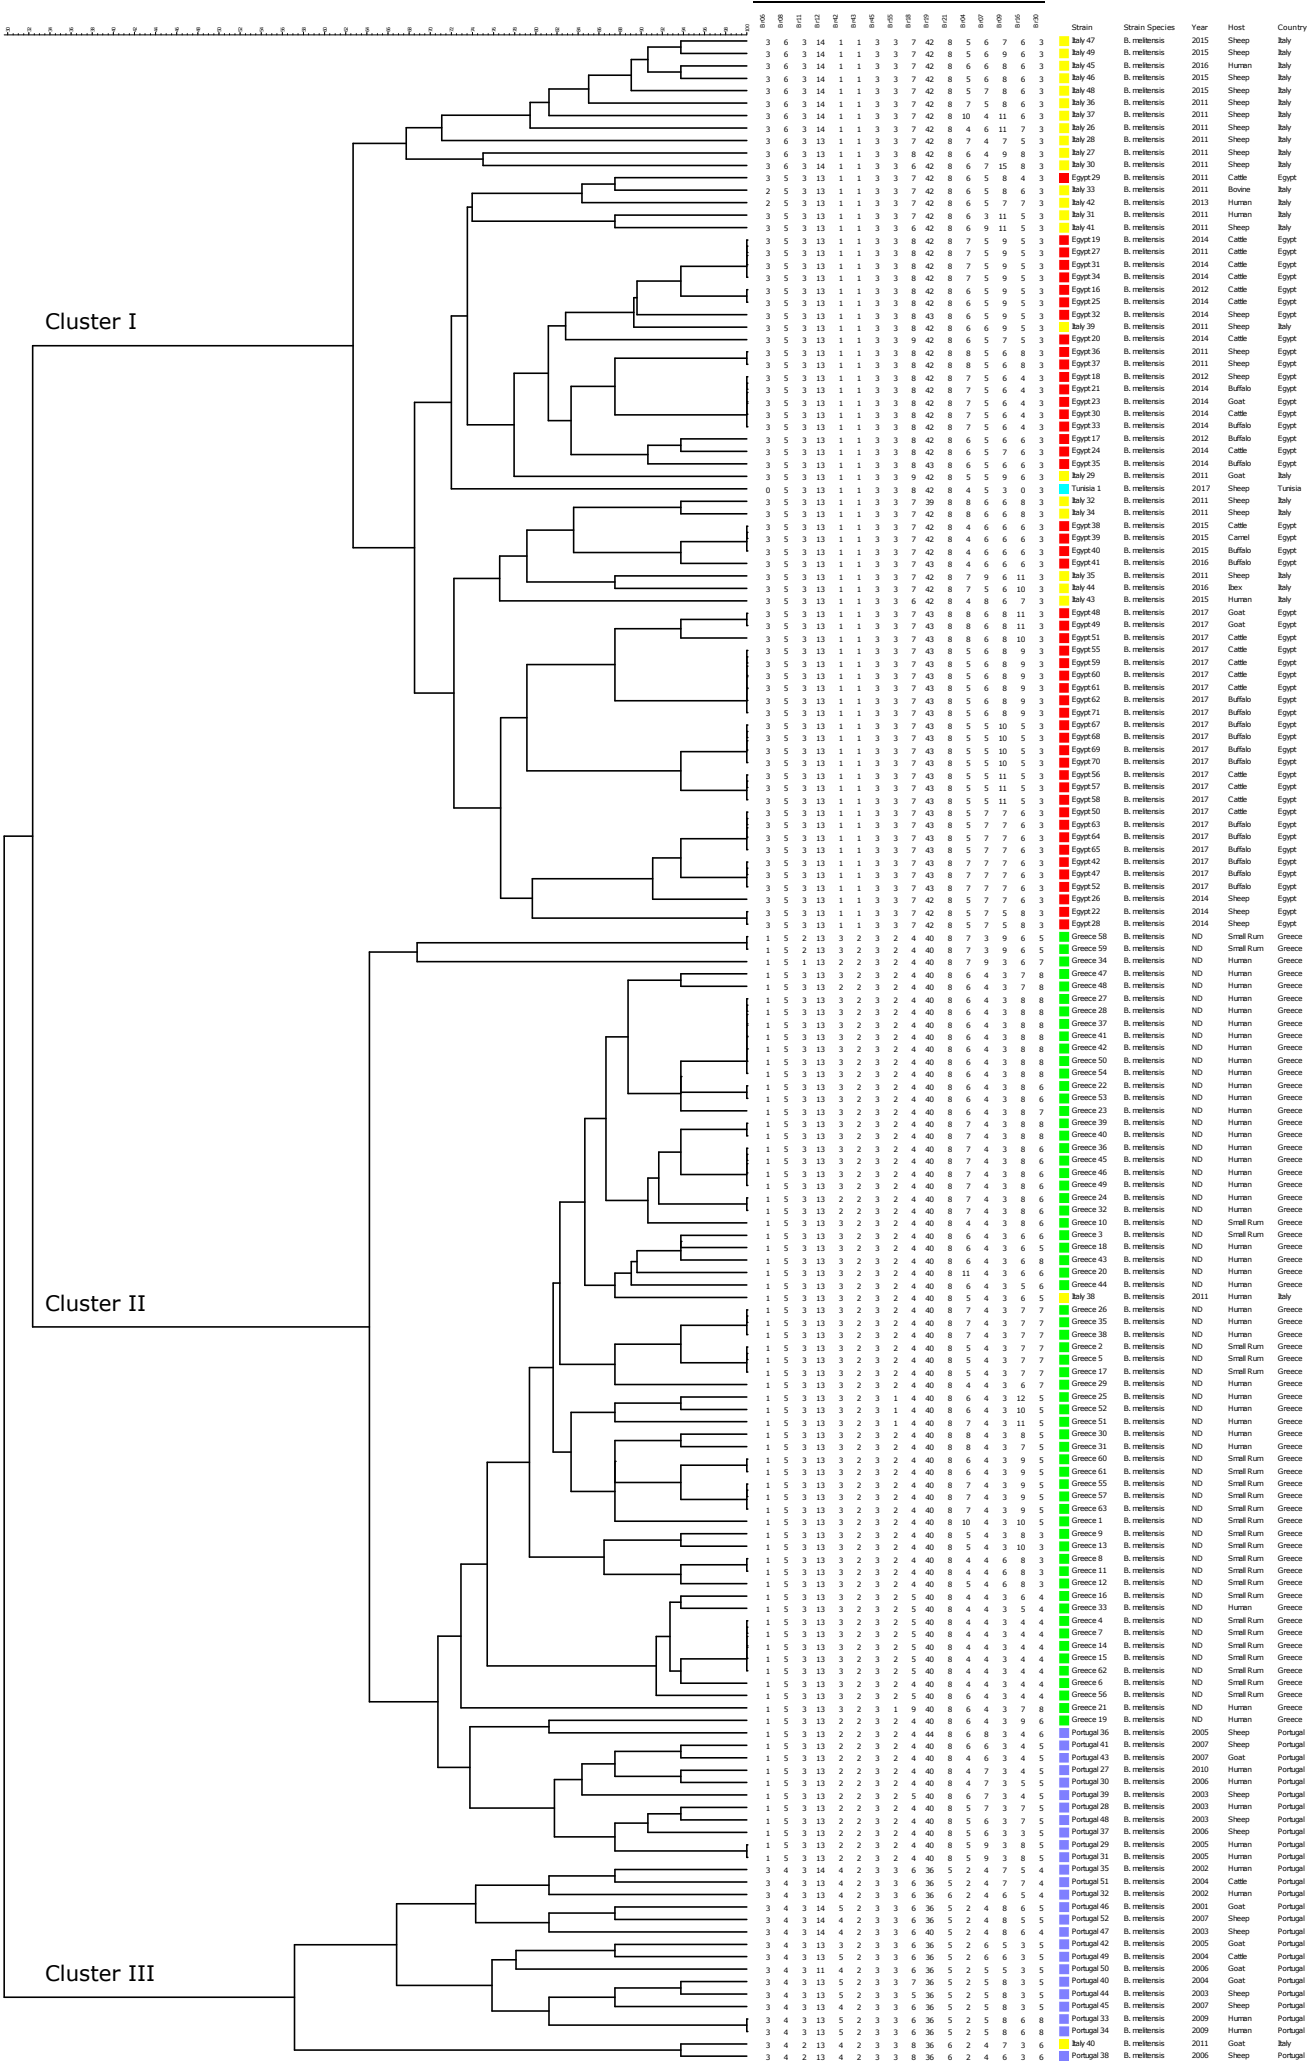

Supplement: s1 [file s1]
